# Supplementary material
Source: publisher figshare collection journal article supplement (https://diabetesjournals.figshare.com/articles/dataset/_/17026526)
Supplement: Supplementary file 1 [file 1]

- A**
- rhMG53-WT 0 ng/kg
  - rhMG53-WT  $1 \times 10^4$  ng/kg
  - rhMG53-WT  $1 \times 10^6$  ng/kg
  - rhMG53-C14A 0 ng/kg
  - rhMG53-C14A  $1 \times 10^4$  ng/kg
  - rhMG53-C14A  $1 \times 10^6$  ng/kg

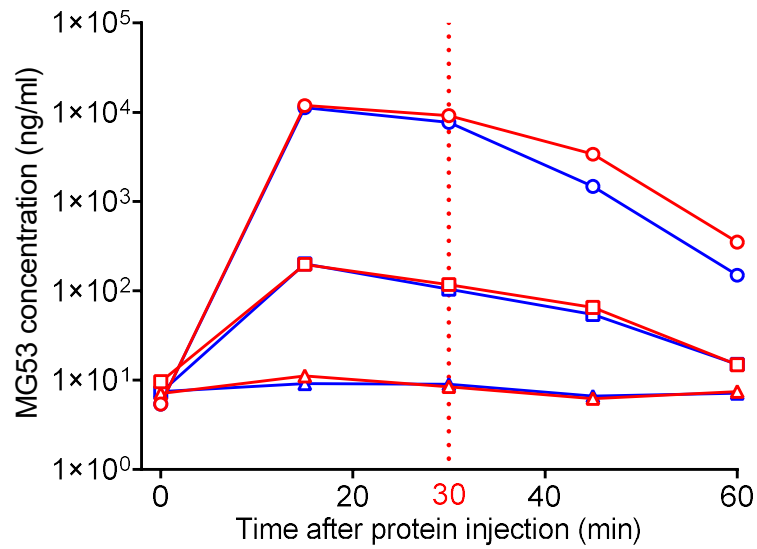

- B**
- $db/+$  +BSA
  - $db/+$  +rhMG53-WT
  - $db/+$  +rh-MG53-C14A
  - $db/db$  +BSA
  - $db/db$  +rhMG53-WT
  - $db/db$  +rh-MG53-C14A

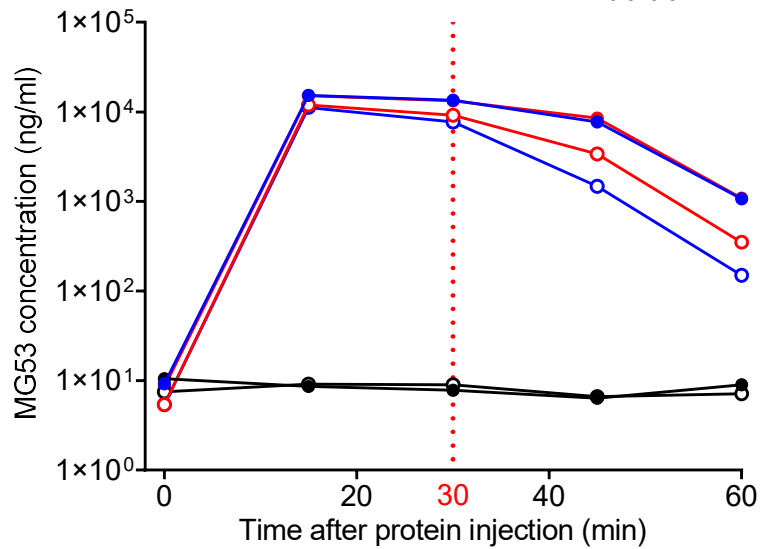

Supplementary Figure 1

**A** Pretreatment (10-week mice)

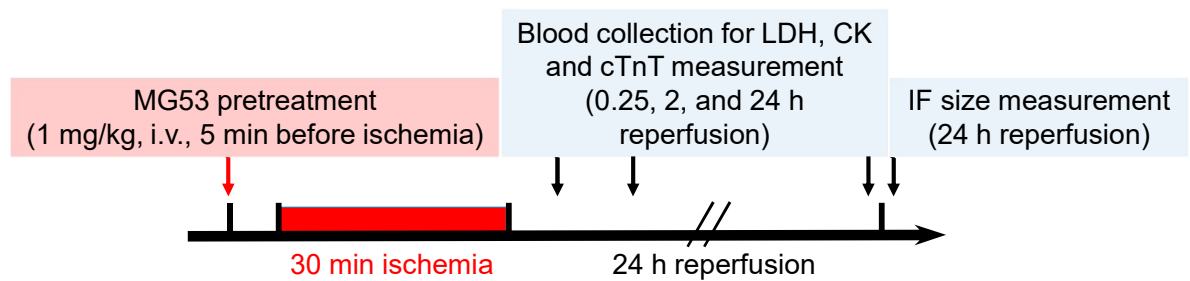

**B** Post-treatment (10-week mice)

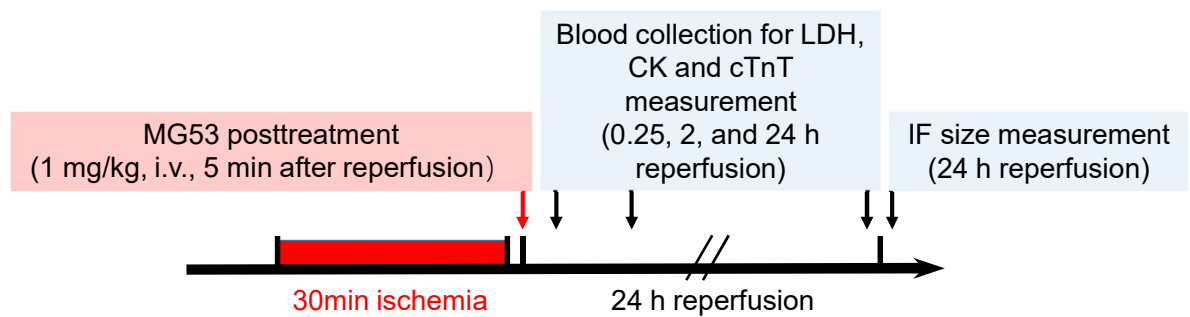

**C** Cultured cardiomyocyte H/R

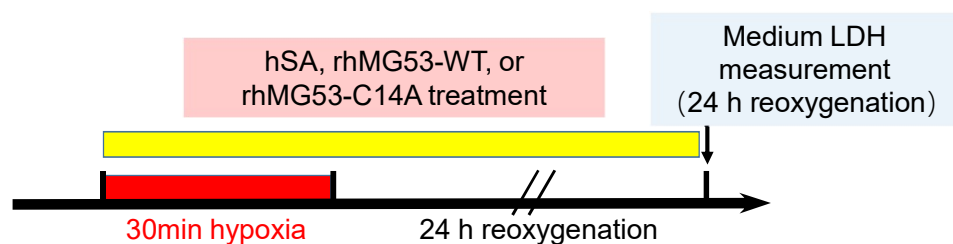

**Supplementary Figure 2**

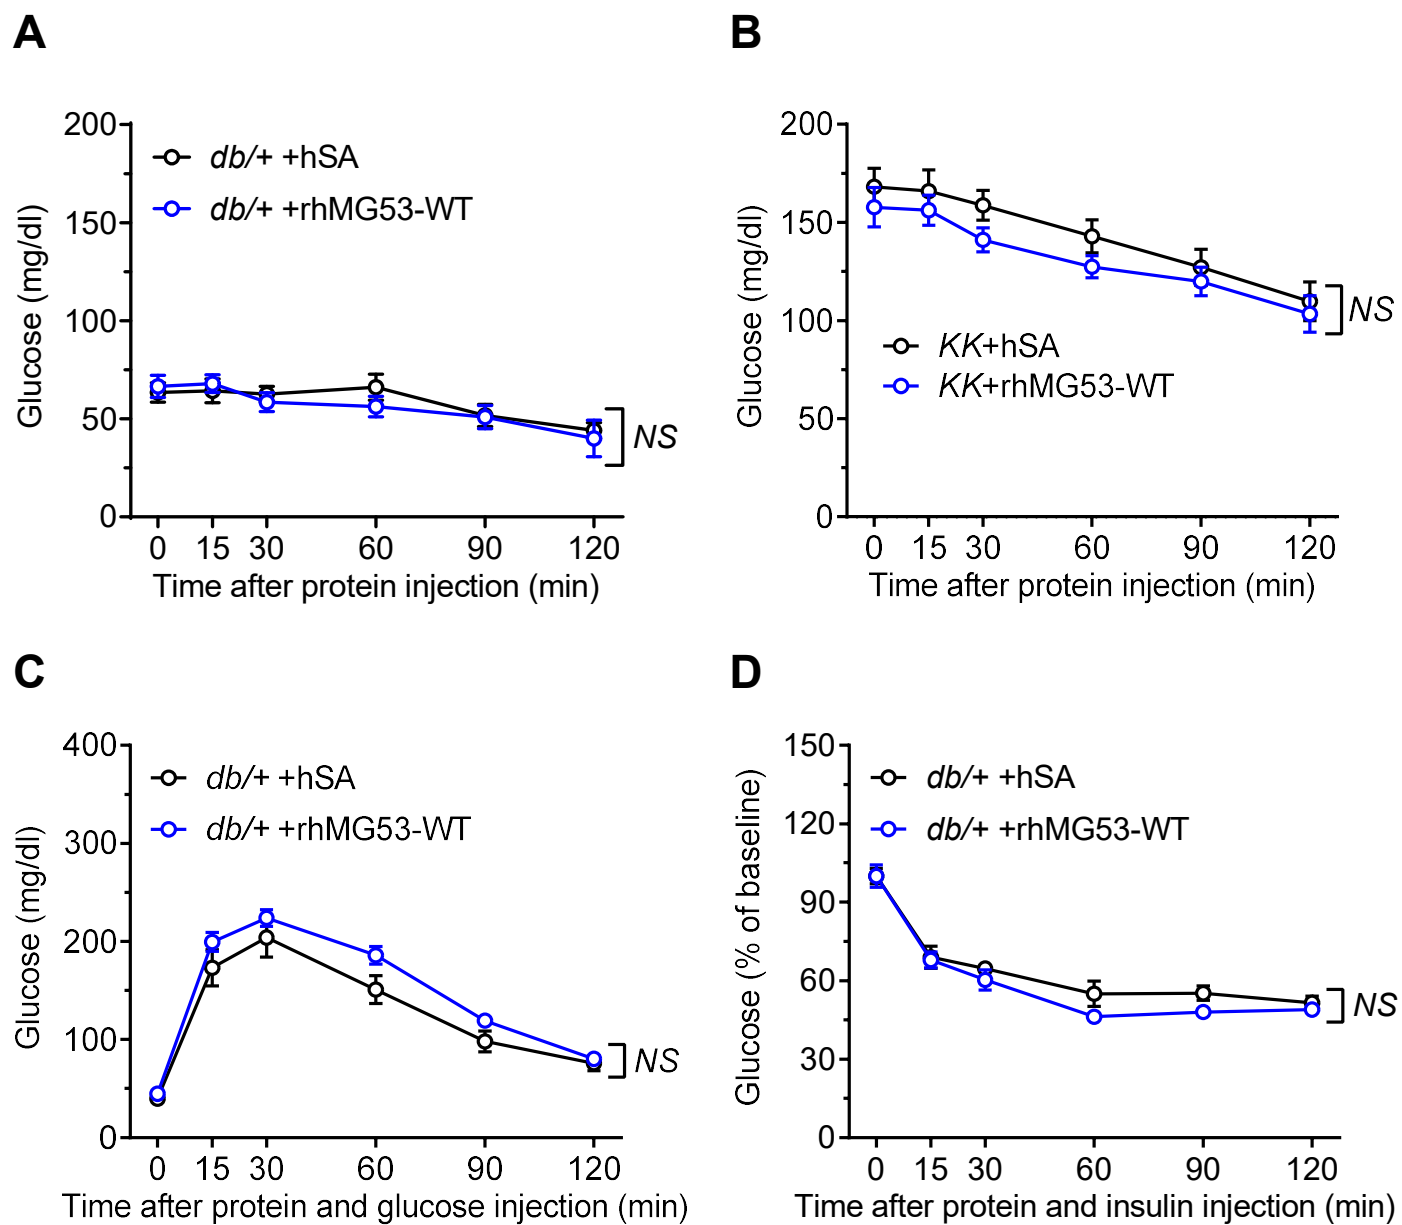

**Supplementary Figure 3**

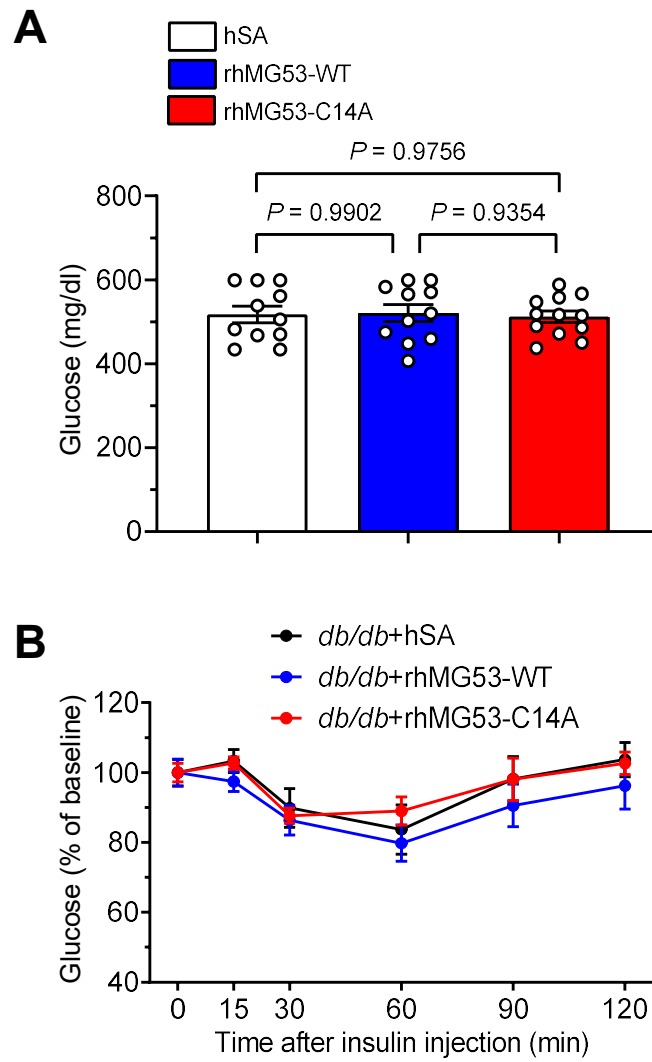

Supplementary Figure 4

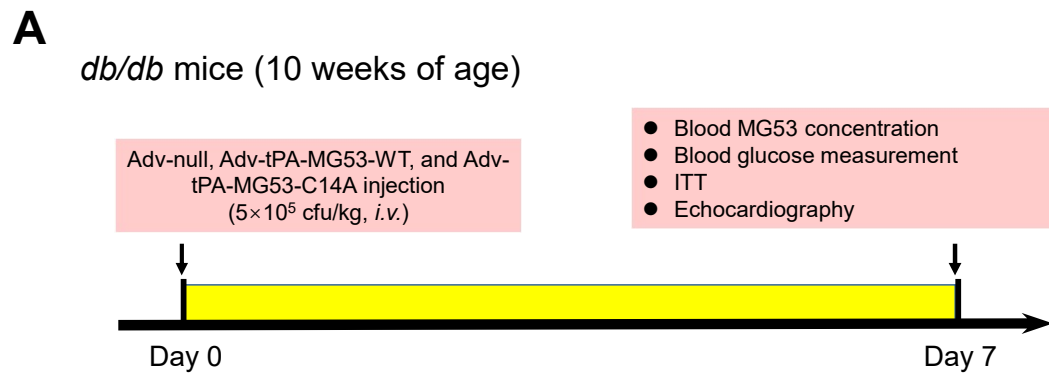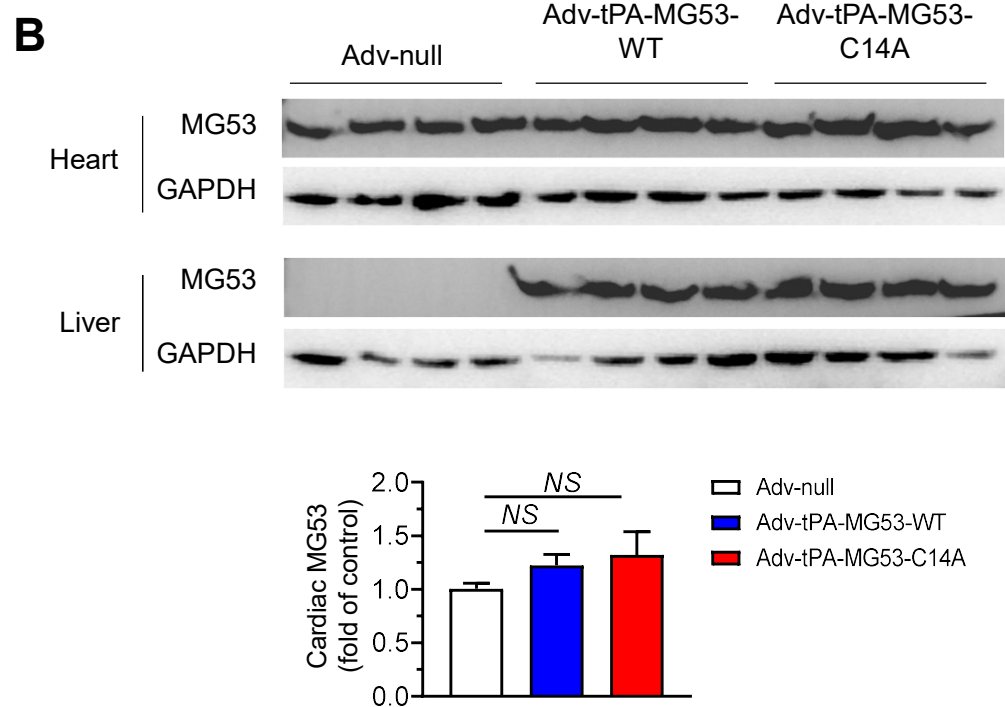

**Supplementary Figure 5**

WT mice

MG53-C14A (ki/ki) mice

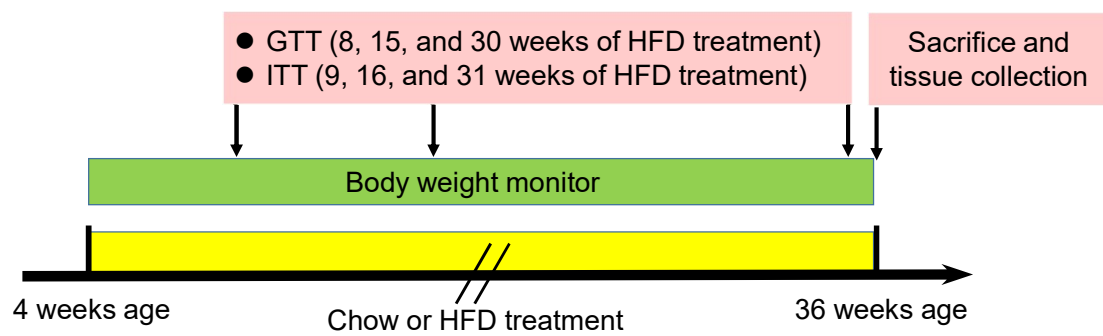

**Supplementary Figure 6**

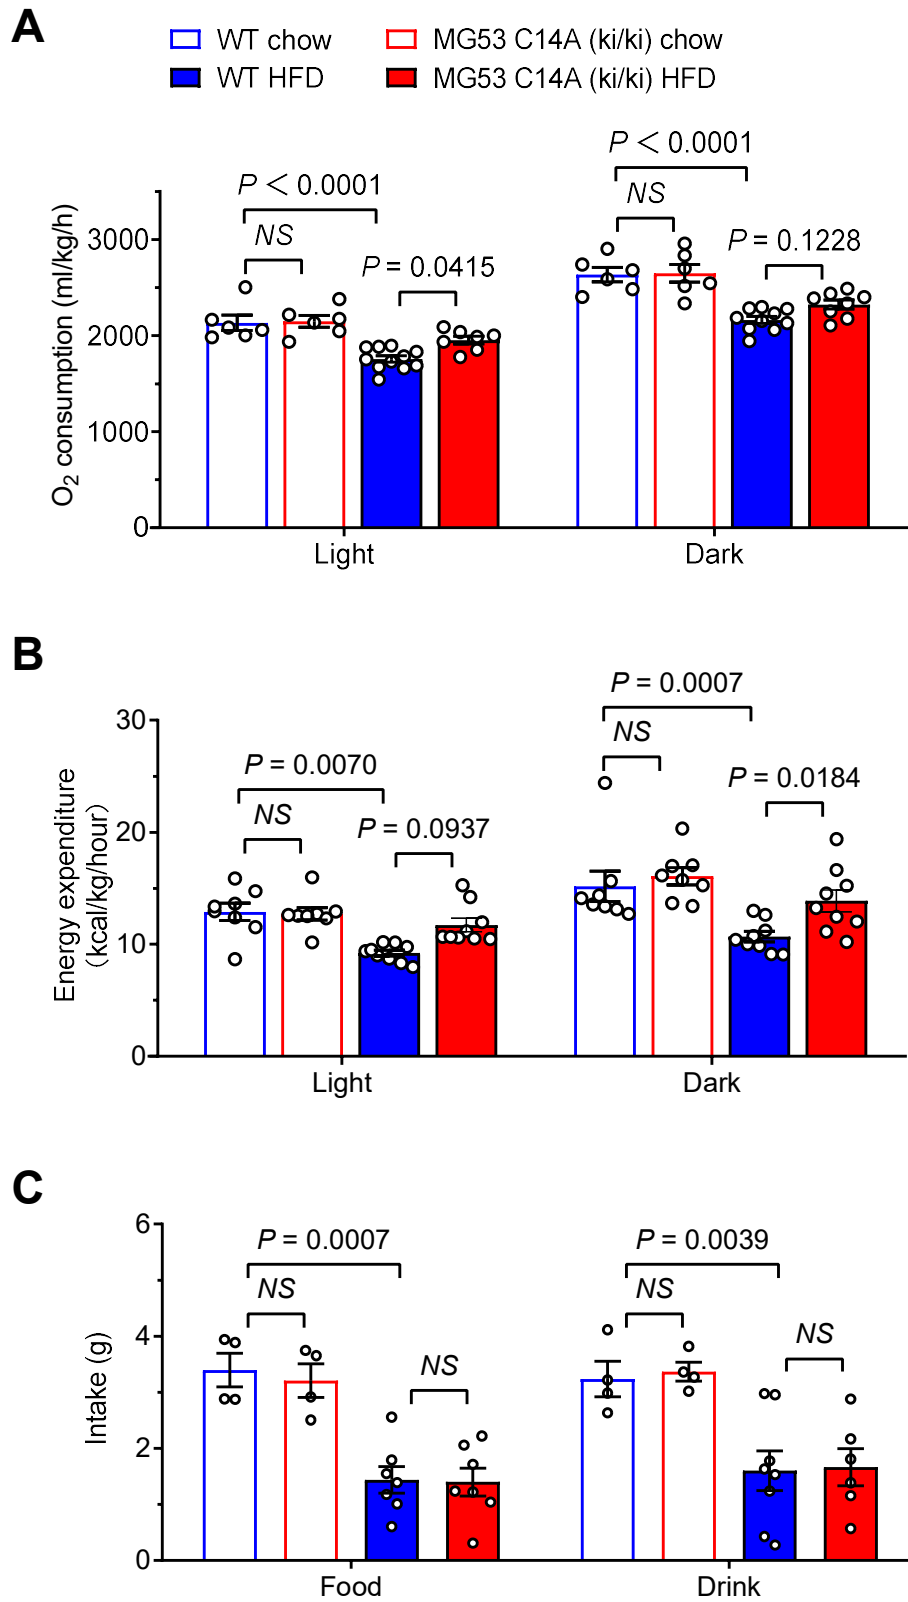

Supplementary Figure 7

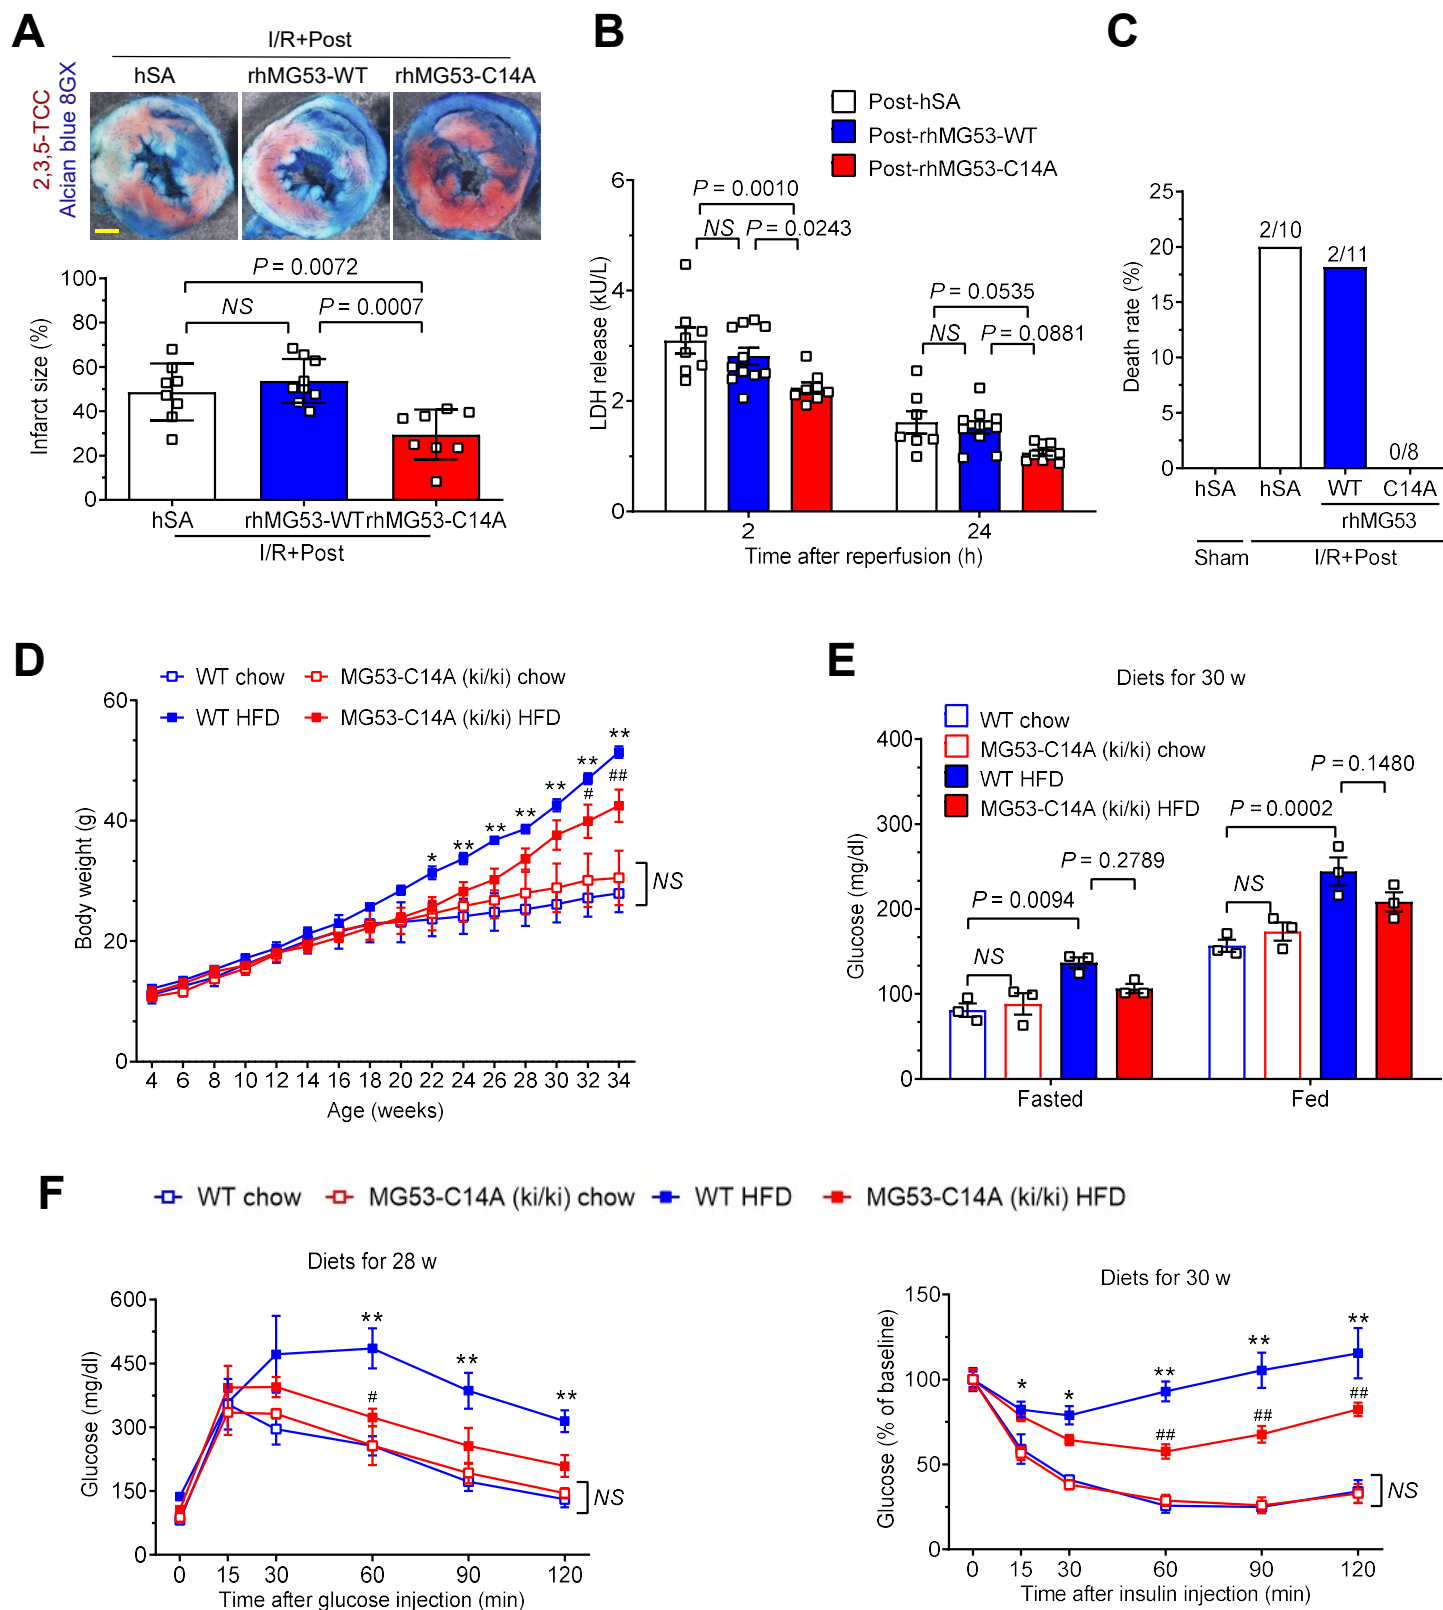

**Supplementary Figure 8**
